# Supplementary material for: High drug-loading system of hollow carbon dots–doxorubicin: preparation, in vitro release and pH-targeted research
Source: Royal Society of Chemistry journal article supplement (doi:10.1039/c9tb00032a), 2019-01-01
Supplement: c9tb00032a1.pdf [file c9tb00032a1.pdf]

## Supporting Information

### High Drug Loading System of Hollow Carbon Dots – Doxorubicin: Preparation, *in-vitro* Release and pH-Targeted Research

Zedi Zhang<sup>a#</sup>, Yuhua Lei<sup>b#</sup>, Xiaohong Yang<sup>a</sup>, Nana Shi<sup>a</sup>, Lina Geng<sup>a\*</sup>, Shuping Wang<sup>a</sup>, Jianjun Zhang<sup>c</sup>, Shikao Shi<sup>a</sup>

**a.** College of Chemistry and Material Science, Hebei Normal University, Shijiazhuang 050024, P. R. China

**b.** College of Basic Medicine, Hebei Medical University, Shijiazhuang 050017, P. R. China

**c.** Testing and Analysis Center, Hebei Normal University, Shijiazhuang 050024, P. R. China.

\*E-mail: genglina0102@126.com

# These authors contributed equally to this study.

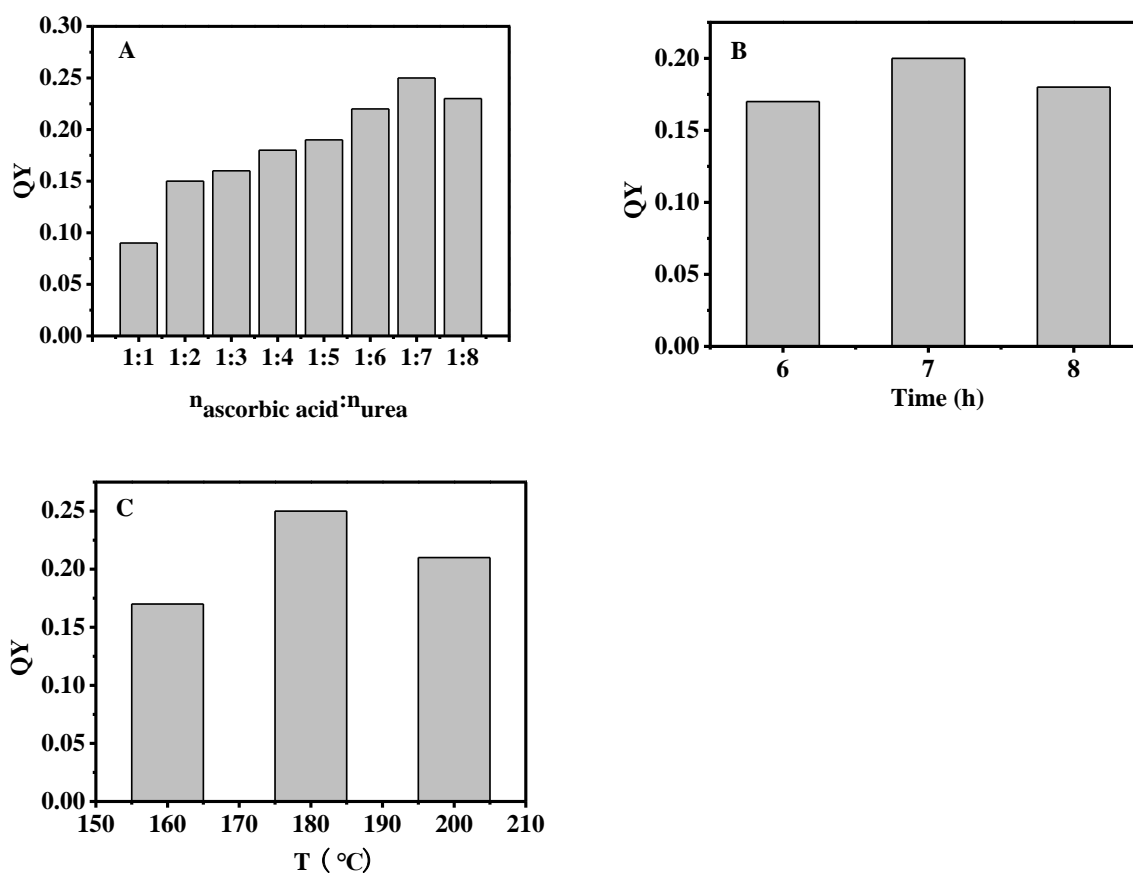

Fig.S1 Effects of (A) the molar ratios of raw materials, (B) hydrothermal time and (C) hydrothermal temperature on quantum yield of HCDs

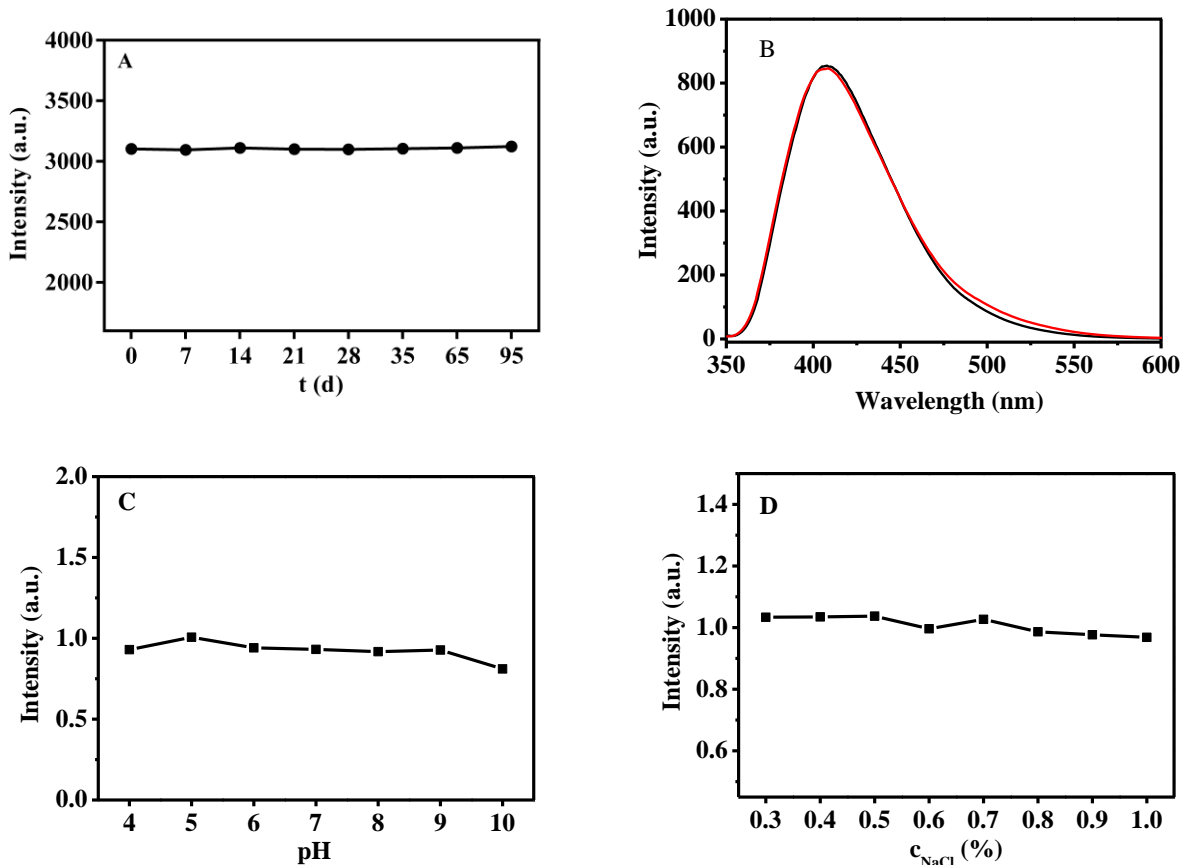

Fig. S2 HCDs stability: (A) fluorescence intensity of HCDs at different time (excitation at 360 nm), (B) fluorescence spectra of HCDs before (black trace) and after HCDs being exposed to the UV light (red trace), (C) fluorescence intensities of HCDs at different pH conditions and (D) different concentrations of NaCl (0.3%, 0.4%, 0.5%, 0.6%, 0.7%, 0.8%, 0.9%, 1.0%).

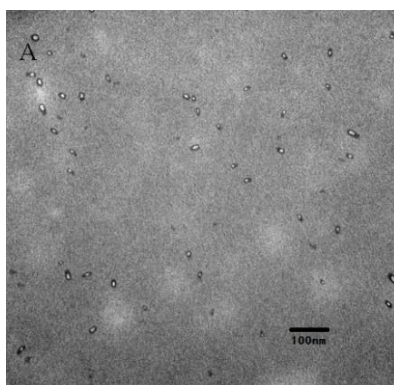

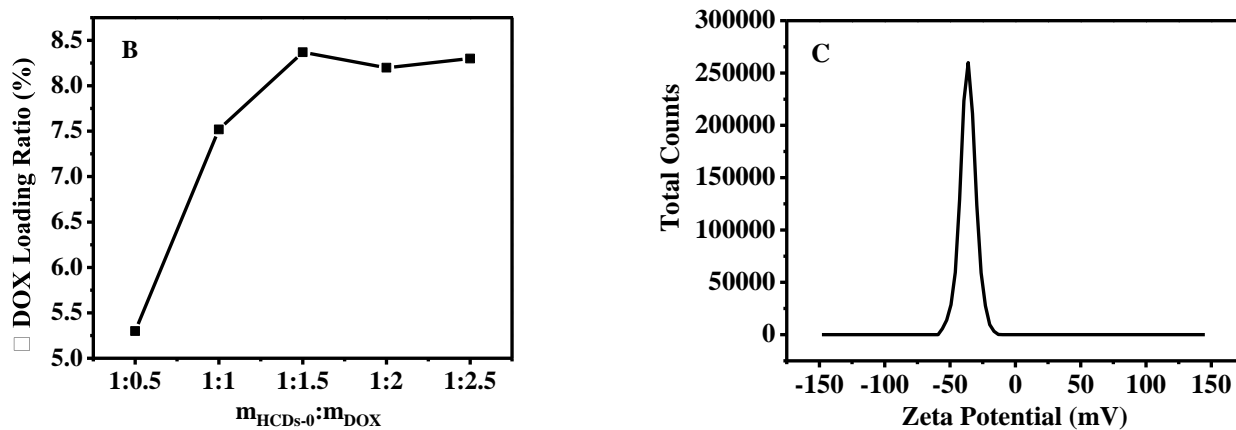

Fig. S3 Characterization of HCDs-0: (A) The TEM micrograph, (B) Effect of mass ratio of HCDs-0 and DOX on DOX loading, (C) Zeta potential.

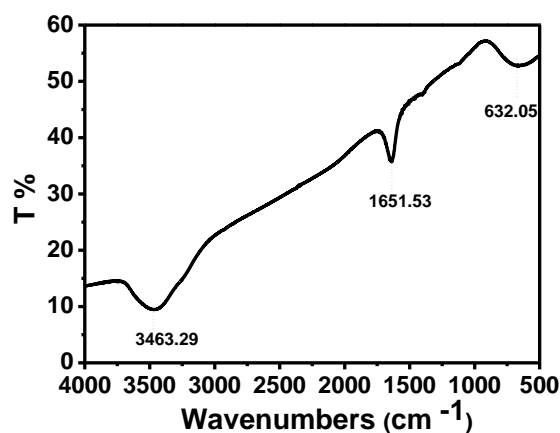

Fig. S4 FT-IR spectrum of HCDs-DOX

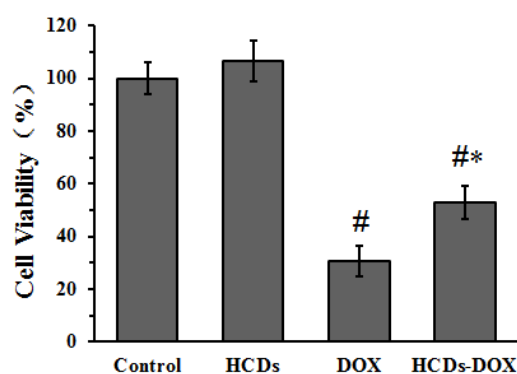

Fig. S5 The cell viability of A549 cells detected by MTT assay treated with HCDs, free DOX or HCDs-DOX (DOX concentration was 10  $\mu$ g/mL) for 48 h, data are presented as the mean  $\pm$  standard deviation (SD; n = 6), #P<0.01 compared to non-treated controls, \*P<0.05 compared to DOX only.

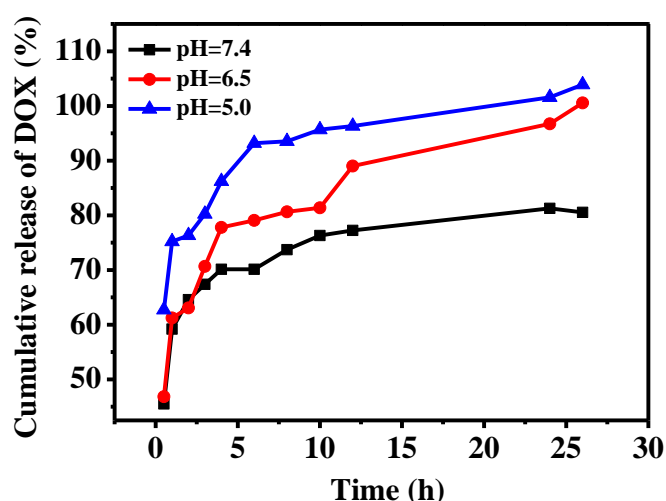

Fig. S6 *in vitro* release of DOX in PBS buffer (pH = 7.4, 6.5, and 5.0) at 37 °C.

Table S1 Fitting results of HCDs-DOX by different release models in PBS buffer (pH=5.0)  
(F = cumulative release amount, k = release constant, t = time).

| Models                 | Equations                                        | R <sup>2</sup> |
|------------------------|--------------------------------------------------|----------------|
| Zero - order kinetics  | $F = 23.26 + 0.79*t$                             | 0.827          |
| First - order kinetics | $F = 70.02*(1 - \exp(-0.069*t))$                 | 0.951          |
| Weibull models         | $F = 85.86*(1 - \exp(-(0.042*(t-1.01))^{0.59}))$ | 0.976          |
| Higuchi models         | $F = 8.44*(t^{0.5}) + 6.63$                      | 0.958          |
| Ritger-Peppas models   | $F = 14.17*(t^{0.39})$                           | 0.967          |

Table S2 Fitting results of HCDs-DOX by different release models in plasma  
(F = cumulative release amount, k = release constant, t = time).

| Models                 | Equations                                          | R <sup>2</sup> |
|------------------------|----------------------------------------------------|----------------|
| Zero - order kinetics  | $F = 12.83 + 0.29*t$                               | 0.924          |
| First - order kinetics | $F = 31.96*(1 - \exp(-0.063*t))$                   | 0.799          |
| Weibull models         | $F = 114.40*(1 - \exp(-(0.0013*(t+2.51))^{0.46}))$ | 0.995          |
| Higuchi models         | $F = 3.24*(t^{0.5}) + 5.92$                        | 0.994          |
| Ritger-Peppas models   | $F = 7.43*(t^{0.35})$                              | 0.991          |

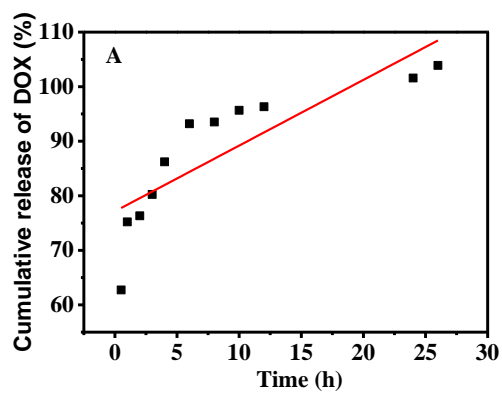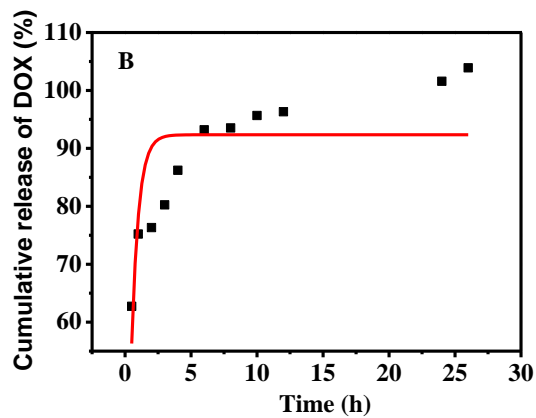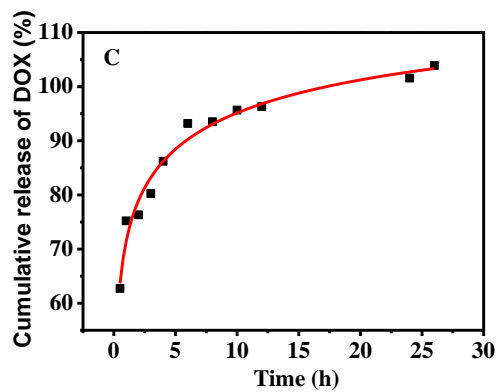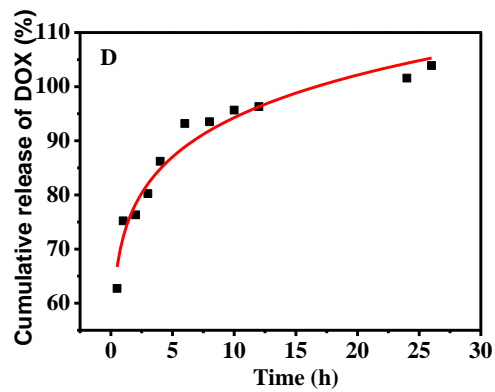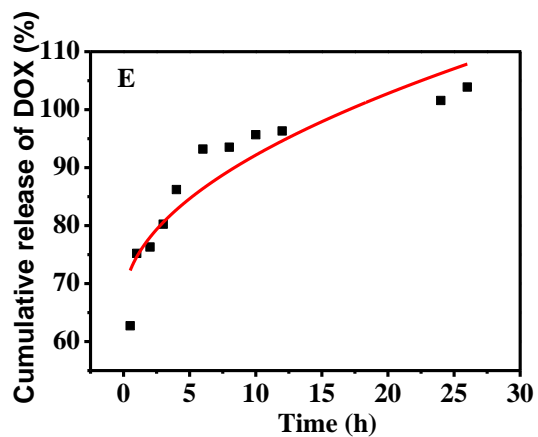

Fig. S7 Profiles of DOX release model: (A) Zero - order kinetics, (B) First - order kinetics, (C) Weibull models, (D) Riger-Peppas models and (E) Higuchi models.

Table S3 Fitting results of DOX by different release models in PBS buffer (pH=5.0)  
(F = cumulative release amount, k = release constant, t = time).

| Models                 | Equations                                         | R <sup>2</sup> |
|------------------------|---------------------------------------------------|----------------|
| Zero - order kinetics  | $F = 77.15 + 1.20*t$                              | 0.663          |
| First - order kinetics | $F = 92.35*(1 - \exp(-1.88*t))$                   | 0.544          |
| Weibull models         | $F = 120.56*(1 - \exp(-(0.67*(t-0.066))^{0.23}))$ | 0.963          |
| Higuchi models         | $F = 8.12*(t^{0.5}) + 66.52$                      | 0.958          |
| Ritger-Peppas models   | $F = 72.26*(t^{0.12})$                            | 0.848          |
